# Supplementary material
Source: ML conference proceedings conference paper supplement (https://openreview.net/forum?id=8HhkbjrWLdE)

## A PROOF OF PROPOSITION 2.1

We first prove the following lemma:

**Lemma A.1.** *If  $\Phi$  is linear, then the Fisher ratio is decreased (or equal) and the optimal linear classification error is increased (or equal).*

If  $\Phi$  is linear, then it is a matrix  $\in \mathbb{R}^{p \times d}$ . We assume that  $\Phi$  has rank  $p$  (and thus  $p \leq d$ ) for the sake of simplicity. By applying a polar decomposition on  $\Phi \Sigma_W^{-\frac{1}{2}}$ , we can write

$$\Phi = UP\Sigma_W^{-\frac{1}{2}},$$

where  $U \in \mathbb{R}^{p \times p}$  is symmetric positive-definite and  $P \in \mathbb{R}^{p \times d}$  verifies  $PP^T = \text{Id}$ . The within-class covariance and class means of  $\Phi x$  are given by

$$\begin{aligned}\bar{\Sigma}_W &= \Phi \Sigma_W \Phi^T = U^2, \\ \bar{\mu}_c &= \Phi \mu_c = UP\Sigma_W^{-\frac{1}{2}} \mu_c.\end{aligned}$$

The Fisher ratio of  $\Phi x$  is thus:

$$\begin{aligned}C^{-1} \text{Tr}(\bar{\Sigma}_W^{-1} \bar{\Sigma}_B) &= \text{Ave}_c \|\bar{\Sigma}_W^{-1/2} \bar{\mu}_c\|^2 \\ &= \text{Ave}_c \|P\Sigma_W^{-\frac{1}{2}} \mu_c\|^2 \\ &\leq \text{Ave}_c \|\Sigma_W^{-\frac{1}{2}} \mu_c\|^2 \\ &= C^{-1} \text{Tr}(\Sigma_W^{-1} \Sigma_B),\end{aligned}$$

so  $\Phi$  decreases the Fisher ratio. Besides, if  $(W, b)$  is the optimal linear classifier on  $\Phi x$ , then  $(W\Phi, b)$  is a linear classifier on  $x$ , and thus has a larger (or equal) error than the optimal linear classifier on  $x$ .

Now, if  $\Phi$  has a linear inverse  $\Phi^{-1}$ , we apply the Lemma A.1 to  $x' = \Phi x$  and  $\Phi' = \Phi^{-1}$  (so that  $\Phi' x' = x$ ), which concludes the proof.

Additionally, we can see from the proof of the lemma that a linear  $\Phi$  preserves the Fisher ratio if and only if  $\|P\Sigma_W^{-\frac{1}{2}} \mu_c\| = \|\Sigma_W^{-\frac{1}{2}} \mu_c\|$  for all  $c$ . This happens when  $\Sigma_W^{-\frac{1}{2}} \mu_c$  is in the orthogonal of  $\text{Ker } P = \text{Ker } UP = \text{Ker } \Phi \Sigma_W^{\frac{1}{2}}$ , which means that  $\Sigma_W^{-1} \mu_c$  is in the orthogonal of  $\text{Ker } \Phi$ . When  $\Phi$  is an orthogonal projector, the orthogonal of  $\text{Ker } \Phi$  is the range of  $\Phi$ .

## B PROOF OF THEOREM 2.2

We begin by proving (3). Since  $\text{Tr}(\Sigma_W) = \text{Ave}_c \text{Tr}(\Sigma_c)$  with  $\text{Tr}(\Sigma_c) = \mathbb{E}(\|x_c - \mu_c\|^2)$  and  $x_c$  is a mixture of  $\mathcal{N}(\mu_{c,k}, \sigma^2 \text{Id})$  we get that  $\text{Tr}(\Sigma_c) = \text{Tr}(\Sigma_M) + d\sigma^2$  with

$$\text{Tr}(\Sigma_M) = C^{-1} \sum_k \pi_{c,k} \|\mu_{c,k} - \mu_c\|^2,$$

which verifies (3).

The inequalities (4) and (5) of Theorem 2.2 are derived from the following lemma which is mostly a consequence of a theorem proved by Donoho & Johnstone (1994) on soft-thresholding estimators.

**Lemma B.1.** *Let  $x$  be a  $d$  dimensional Gaussian vector whose distribution is  $\mathcal{N}(\mu, \sigma^2 \text{Id})$  with  $|\mu^{(r)}| \sim r^{-s}$ . For all  $d \geq 4$  and  $\lambda = \sigma \sqrt{2 \log d}$ ,*

$$\mathbb{E}(\|\rho_t(x) - \mu\|^2) = O(\sigma^{2-1/s} \log d). \quad (9)$$

Each class  $x_c$  is a mixture of several  $x_{c,k}$  whose distributions are  $\mathcal{N}(\mu_{c,k}, \sigma^2 \text{Id})$ . We first prove the theorem by applying this lemma to each  $x_{c,k}$ , and we shall then prove the lemma.

We apply (9) to  $x = Fx_{c,k}$ ,  $\mu = F\mu_{c,k} = \{\langle \mu_{c,k}, f_m \rangle\}_m$ , and  $\Phi = F^T \rho F$ . Since  $F$  is orthogonal

$$\mathbb{E}(\|\Phi(x_{c,k}) - \mu_{c,k}\|^2) = \mathbb{E}(\|\rho_t Fx_{c,k} - F\mu_{c,k}\|^2) = O(\sigma^{2-1/s} \log d). \quad (10)$$

Let  $\bar{\mu}_c = \mathbb{E}(\Phi(x_c))$  and  $\bar{\mu}_{c,k} = \mathbb{E}(\Phi(x_{c,k}))$ . As we have the decomposition

$$\mathbb{E}(\|\Phi(x_{c,k}) - \mu_{c,k}\|^2) = \mathbb{E}(\|\Phi(x_{c,k}) - \bar{\mu}_{c,k}\|^2) + \|\bar{\mu}_{c,k} - \mu_{c,k}\|^2,$$

equation (10) implies that

$$\|\bar{\mu}_{c,k} - \mu_{c,k}\|^2 = O(\sigma^{2-1/s} \log d) \quad (11)$$

and

$$\mathbb{E}(\|\Phi(x_{c,k}) - \bar{\mu}_{c,k}\|^2) = O(\sigma^{2-1/s} \log d). \quad (12)$$

We first prove (5) by observing that

$$\|\mu_c - \bar{\mu}_c\|^2 = \left\| \sum_k \pi_{c,k} (\mu_{c,k} - \bar{\mu}_{c,k}) \right\|^2 \leq \left( \sum_k \pi_{c,k} \|\mu_{c,k} - \bar{\mu}_{c,k}\| \right)^2$$

It results from (11) that

$$\|\mu_c - \bar{\mu}_c\|^2 = O(\sigma^{2-1/s} \log d)$$

which proves (5).

As in the proof of (3), we verify that

$$\text{Tr}(\bar{\Sigma}_W) = \text{Tr}(\bar{\Sigma}_M) + C^{-1} \sum_{c,k} \pi_{c,k} \mathbb{E}(\|\Phi(x_{c,k}) - \bar{\mu}_{c,k}\|^2),$$

with

$$\text{Tr}(\bar{\Sigma}_M) = C^{-1} \sum_{c,k} \pi_{c,k} \|\bar{\mu}_{c,k} - \bar{\mu}_c\|^2.$$

Inserting (12) gives

$$\text{Tr}(\bar{\Sigma}_W) = \text{Tr}(\bar{\Sigma}_M) + O(\sigma^{2-1/s} \log d). \quad (13)$$

By decomposing and inserting (11) we get

$$\begin{aligned} \text{Tr}(\bar{\Sigma}_M) &\leq C^{-1} \sum_{c,k} \pi_{c,k} \left( \|\bar{\mu}_{c,k} - \mu_{c,k}\| + \|\mu_{c,k} - \mu_c\| + \|\mu_c - \bar{\mu}_c\| \right)^2 \\ &= C^{-1} \sum_{c,k} \pi_{c,k} \left( \|\mu_{c,k} - \mu_c\| + O(\sigma^{1-1/(2s)} \log^{1/2} d) \right)^2 \\ &= C^{-1} \sum_{c,k} \pi_{c,k} 2 \left( \|\mu_{c,k} - \mu_c\|^2 + O(\sigma^{2-1/s} \log d) \right) \\ &= 2 \text{Tr}(\Sigma_M) + O(\sigma^{2-1/s} \log d). \end{aligned}$$

Inserting this inequality in (13) proves that

$$\text{Tr}(\bar{\Sigma}_W) = 2 \text{Tr}(\Sigma_M) + O(\sigma^{2-1/s} \log d)$$

which proves (4).

We now prove Lemma B.1. Donoho & Johnstone (1994) proved that for all  $d \geq 4$ ,

$$\mathbb{E}(\|\rho_t(x) - \mu\|^2) \leq (2 \log d + 1) (\sigma^2 + \sum_{m=1}^d \min(\mu[m]^2, \sigma^2)). \quad (14)$$

We are now going to prove that if  $|\mu^{(r)}| \sim r^{-s}$  then

$$\sum_{m=1}^d \min(\mu[m]^2, \sigma^2) = O(\sigma^{2-1/s}).$$

Let us first observe that

$$\sum_{m=1}^d \min(\mu[m]^2, \sigma^2) = \sum_{r=M+1}^d |\mu^{(r)}|^2 + M\sigma^2 \quad (15)$$

with  $|\mu^{(M)}| \geq \sigma > |\mu^{(M+1)}|$ .

Since  $|\mu^{(r)}| \sim r^{-s}$ ,

$$\sum_{m=1}^d \min(\mu[m]^2, \sigma^2) \sim \sum_{r=M+1}^d r^{-2s} + M\sigma^2 \sim M^{1-2s} + M\sigma^2.$$

Since  $\sigma \sim |\mu^{(M)}| \sim M^{-s}$ , we conclude

$$\sum_{m=1}^d \min(\mu[m]^2, \sigma^2) = O(\sigma^{2-1/s}).$$

Inserting this result in (14) finishes the proof of the lemma.

### C PROOF OF THEOREM 2.3

We choose  $x = ru$  with  $u \sim \mathcal{U}(\mathbb{S}^{d-1})$  and  $r \in ]0, 1]$  to be determined, with  $r$  and  $u$  independent. Let us fix  $p \geq d$ ,  $F \in \mathbb{R}^{p \times d}$ ,  $W \in \mathbb{R}^{1 \times p}$  and  $b \in \mathbb{R}$ . With  $g(x) = W\rho_{rt}Fx + b$ , we have:

$$\begin{aligned} g(x) &= \sum_{m=1}^p w_m \rho_r(r \langle u, f_m \rangle - \lambda) + b \\ &= r \sum_{m=1}^p w_m \rho_r(\langle u, f_m \rangle - \lambda/r) + b. \end{aligned}$$

If  $\lambda = 0$ , this gives  $g(x) = rW\rho_r(Fu) + b$  which is an affine function of  $r$ . Therefore, its sign can change at most once. We choose  $h(x) = \cos(2\pi\|x\|)$  so that:

$$\text{sgn}(h(x)) = \begin{cases} +1 & r < \frac{1}{4} \text{ or } \frac{3}{4} < r \\ -1 & \frac{1}{4} < r < \frac{3}{4} \end{cases}$$

Now  $g(x)$  is an affine function of  $r$ , so at least one of the following must occur:

$$\begin{cases} \text{sgn}(g(x)) = -1 & r < \frac{1}{4} \\ \text{sgn}(g(x)) = +1 & \frac{1}{4} < r < \frac{3}{4} \\ \text{sgn}(g(x)) = -1 & \frac{3}{4} < r \end{cases}$$

We finally choose  $r \sim \mathcal{U}(0, 1)$  and so we conclude that:

$$\mathbb{P}[\text{sgn}(g(x)) \neq \text{sgn}(h(x))] \geq \frac{1}{4}.$$

If  $\lambda > 0$ , then when  $r \leq \lambda$ , we have  $\langle u, f_m \rangle \leq \|u\|\|f_m\| \leq 1 \leq \lambda/r$ , which means that  $g(x) = b$  is constant. We thus choose  $r \sim \mathcal{U}(0, \lambda)$ ,  $h(x) = \cos(\pi/\lambda\|x\|)$  and so we conclude that:

$$\mathbb{P}[\text{sgn}(g(x)) \neq \text{sgn}(h(x))] = \frac{1}{2} \geq \frac{1}{4}.$$

### D IMPLEMENTATION AND NETWORK DIMENSIONS

All networks are trained with SGD with a momentum of 0.9 and a weight decay of  $10^{-4}$  for the classifier weights, with no weight decay being applied to tight frames. The learning rate is set to 0.01 for all networks, with a Parseval regularization parameter  $\alpha = 0.0005$ . The batch size is 128 for all experiments. The scattering transform is based on the *Kymatio* package (Andreux et al., 2020).

Table 4: Number of parameters of scattering architectures on ImageNet. They are dominated by the size of the  $1 \times 1$  orthogonal projectors  $P_j$ . Indeed, the wavelet tight frame  $F_w$  has a redundancy of  $(L + 1/4)$ , whereas in ResNet strided convolutions have a redundancy of  $1/2$ . This is due to the fact that  $F_w$  is not learned. However,  $F_w$  comes with a known structure across channels, which is beneficial for the analysis of the projectors  $P_j$ .

|                 | $\Phi$     | $S_T$ | $S_P$ | $S_C$ | ResNet-18 |
|-----------------|------------|-------|-------|-------|-----------|
| <b>ImageNet</b> | Parameters | 25.9M | 27.6M | 31.2M | 11.7M     |

Standard data augmentation was used on CIFAR and ImageNet: horizontal flips and random crops for CIFAR, and random resized crops of size 224 and horizontal flips for ImageNet. Classification error on ImageNet validation set is computed on a single center-crop of size 224.

Non-linearity thresholds are set to  $\lambda = 1.5\sqrt{d/p}$  for the soft-thresholding  $\rho_t$ , and  $\lambda = \sqrt{d/p}$  for the thresholded rectifier  $\rho_{rt}$ . Here  $d$  and  $p$  represent the dimension of the patches the convolutional operators  $F$  and  $F^T$  act on. To ensure that the fixed threshold is well adapted to the scale of the input  $x$ , we normalize all its patches so that they have a norm of  $\sqrt{d}$ . For  $1 \times 1$  convolutional operators as in  $S_C$ , this amounts to normalizing the channel vectors at each spatial location in  $x$ .

**Two-layer networks** When learning a frame contraction directly on the input image,  $F$  is a convolutional operator over image patches of size  $k \times k$  with a stride of  $k/2$ , where  $k = 14$  for MNIST ( $d = k^2 = 196$ ) and  $k = 8$  for CIFAR ( $d = 3k^2 = 192$ ). The frame  $F$  has  $p$  output channels, where  $p = 2048$  for MNIST and  $p = 8192$  for CIFAR. It thus maps each patch of dimension  $d$  to a channel vector of size  $p \geq d$ . Training lasts for 300 epochs, the learning rate being divided by 10 every 70 epochs.

**Scattering tree** We use  $J = 3$  for MNIST and CIFAR and  $J = 4$  for ImageNet. Each  $F_w$  uses  $L = 8$  angles. It is followed by a standardization which sets the mean and variance of every channel to 0 and 1. We then learn a  $1 \times 1$  convolutional orthogonal projector  $P_J$  to reduce the number of channels to  $d = 512$ . We finally apply a  $1 \times 1$  spatial normalization, as before a tight frame thresholding. Training lasts for 300 epochs for MNIST and CIFAR (200 epochs for ImageNet), the learning rate being divided by 10 every 70 epochs (60 epochs for ImageNet).

**Learned scattering** We use  $J = 4$  for CIFAR and  $J = 6$  for ImageNet. Each  $F_w$  uses  $L = 8$  angles. Each  $P_j$  is an orthogonal projector which is a  $1 \times 1$  convolution. It reduces the number of channels to  $d_j$  with  $d_1 = 64$ ,  $d_2 = 128$ ,  $d_3 = 256$  and  $d_4 = 512$ . For ImageNet, we also have  $d_5 = d_6 = 512$ . It is followed by a normalization which sets the norm across channels of each spatial position to  $\sqrt{d_j}$ .  $F_j$  is a  $1 \times 1$  convolutional tight frame with  $p_j$  output channels, where  $p_1 = 1024$ ,  $p_2 = 2048$ ,  $p_3 = 4096$  and  $p_4 = 8192$  for CIFAR,  $p_1 = 512$ ,  $p_2 = p_3 = 1024$  and  $p_4 = p_5 = p_6 = 2048$  for ImageNet. Training lasts for 300 epochs for CIFAR (200 epochs for ImageNet), the learning rate being divided by 10 every 70 epochs (60 epochs for ImageNet).

**Fisher ratios** Fisher ratios (eq. (1)) were computed using estimations of  $\Sigma_W$  and  $\mu_c$  on the validation set. These estimations are unstable when the dimension  $d$  becomes large with respect to the number of data samples. To mitigate this, the Fisher ratios across layers from Table 3 were computed on the train set. Fisher ratios on ImageNet from Table 2 were computed only across channels, by considering each pixel as a distinct sample of the same class, in order to reduce dimensionality.

Figure 1: Examples of filters  $f_m$  from the convolutional tight frame  $F$  learned directly on the input  $x$  for CIFAR-10, using an absolute value non-linearity  $\rho_a$ . They resemble wavelet filters.

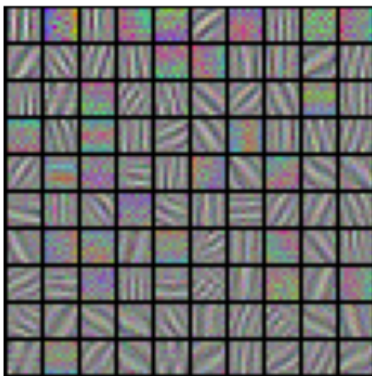

Supplement: supplementary_material [file attachment]
